# Supplementary material for: Hypoxia-induced transcriptional differences in African and Asian versus European diabetic cybrids
Source: Springer Nature journal article supplement (doi:10.1038/s41598-023-30518-x), 2023-03-07
Supplement: 41598_2023_30518_MOESM1_ESM.pdf [file 41598_2023_30518_MOESM1_ESM.pdf]

## Supplemental Material

### Hypoxia-Induced Transcriptional Differences in African and Asian Versus European Diabetic Cybrids

Andrew H. Dolinko<sup>1,2</sup>, Marilyn Chwa<sup>2</sup>, Kevin Schneider<sup>2</sup>, Mithalesh K. Singh<sup>2</sup>, Shari Atilano<sup>2</sup>, Jie Wu<sup>3</sup>, and M. Cristina Kenney\*<sup>1,2</sup>

<sup>1</sup> *Department of Pathology and Laboratory Medicine, University of California Irvine, Irvine, California, 92697*

<sup>2</sup> *Department of Ophthalmology, University of California Irvine, Irvine, California, 92697*

<sup>3</sup> *Department of Biological Chemistry, University of California Irvine, Irvine, California, 92697*

**Keywords:** Diabetic retinopathy (DR); Retinal Pigment Epithelial Cells; African and Asian Mitochondrial DNA Haplogroups; cybrid cell model; RNA-seq

**\*Corresponding Author:**

**M. Cristina Kenney, M.D., Ph.D.**

**Professor, Director Mitochondrial Research Laboratory**

Department of Ophthalmology, Gavin Herbert Eye Institute

University of California Irvine

843 Health Science Road

Hewitt Hall, Room 2028

Irvine, CA 92697-4390

Phone: (949) 824-7603

Email: [mkenney@hs.uci.edu](mailto:mkenney@hs.uci.edu)



**Supplemental Table 2. Status of diabetic retinopathy in the Euro and Afr+Asi DM cybrids**

| European DM cybrids |            |     |               |               | African+Asian DM cybrids |            |     |          |               |
|---------------------|------------|-----|---------------|---------------|--------------------------|------------|-----|----------|---------------|
| Cybrid              | Haplogroup | Age | Diabetes Type | DR Status     | Cybrid                   | Haplogroup | Age | Diabetes | DR Status     |
| 13.103              | K1a3       | 25  | Type 2        | Mild/No DR    | 11.30                    | L1b2a      | 54  | Type 2   | NPDR          |
| 16.182              | L          | 78  | Type 2        | Severe NPDR   | 13.55                    | D4a2b      | 45  | Type 2   | Background DR |
| 16.184              | U          | 60  | Type 2        | NPDR          | 13.124                   | L1b2a      | 31  | Type 1   | No DR         |
| 16.185              | U5a1a1     | 68  | Type 2        | NPDR          | 15.176                   | L0a1a      | 32  | Type 2   | No DR         |
| 16.186              | H1         | 48  | Type 2        | NPDR          |                          |            |     |          |               |
| 16.190              | H          | 80  | Type 2        | Background DR |                          |            |     |          |               |

NPDR- Non-proliferative diabetic retinopathy; DR- Diabetic retinopathy

**Supplementary Table 3. Antibodies Used In These Experiments.**

| <b><u>Antigen</u></b> | <b><u>Antibody</u></b>                                                                              | <b><u>Primary/Secondary</u></b>      | <b><u>Dilution</u></b> | <b><u>Protein Band Size(s)</u></b>          |
|-----------------------|-----------------------------------------------------------------------------------------------------|--------------------------------------|------------------------|---------------------------------------------|
| ZO-1<br>(TJP1)        | ZO-1 Polyclonal<br>Antibody (Cat<br>#40-2200;<br>ThermoFisher<br>Scientific)                        | Primary                              | 1:1,000                | 225 kDa (ZO-1 plus)<br>200 kDa (ZO-1 minus) |
| Occludin<br>(OCLN)    | Occludin<br>Polyclonal<br>Antibody (Cat<br>#71-1500;<br>ThermoFisher<br>Scientific)                 | Primary                              | 1:1,000                | 29 kDa (isoform)                            |
| Beta-<br>Actin        | $\beta$ -actin (13E5)<br>Rabbit mAb<br>(Cat# 4970; Cell<br>Signaling<br>Technology,<br>Danvers, MA) | Primary<br>(Housekeeping<br>Protein) | 1:10,000               | 45 kDa                                      |
| Rabbit<br>IgG         | Anti-Rabbit IgG,<br>HRP-linked<br>Antibody (Cat#<br>7074; Cell<br>Signaling<br>Technology)          | Secondary                            | 1:10,000               | N/A                                         |

**Supplemental Table 4. Transcripts of endocytosis-associated genes show similar changes between room air and hypoxia for all cybrids.**

| <a href="#">tracking id</a> | 11-31 normoxia | 11-31 HYPOXIA | 11-30 normoxia | 11-30 HYPOXIA | 11.38 normox | 11.38 HYPOX | 13.124 normox | 13.124 HYPOX |
|-----------------------------|----------------|---------------|----------------|---------------|--------------|-------------|---------------|--------------|
| <a href="#">CLTA</a>        | 208.019        | 249           | 156.142        | 294.979       | 186.529      | 226.353     | 149.928       | 220.616      |
| <a href="#">MERTK</a>       | 0.837731       | 0.414042      | 1.22734        | 0.253667      | 1.08911      | 0.762945    | 2.39124       | 0.93357      |
| <a href="#">RAC1</a>        | 152.373        | 144.824       | 146.348        | 145.885       | 167.052      | 153.58      | 143.093       | 151.286      |

| 13.45 H normox | 13.45 H HYPOX | 16.186 normox | 16.186 HYPOX | 11.08 normox | 11.08 HYPOX | 13.103 normox | 13.103 HYPOX |
|----------------|---------------|---------------|--------------|--------------|-------------|---------------|--------------|
| 248.192        | 259.53        | 155.08        | 283.733      | 159.779      | 202.7       | 153.008       | 247.348      |
| 0.931135       | 0.38165       | 0.498627      | 0.147659     | 1.64637      | 0.832872    | 3.02166       | 0.756854     |
| 149.003        | 145.005       | 129.143       | 165.542      | 153.968      | 186.161     | 130.755       | 145.597      |

| 14-135 normoxia | 14-135 HYPOXIA | 16-190 normoxia | 16-190 HYPOXIA | 11-18 normoxia | 11-18 HYPOXIA | 13-55 normoxia | 13-55 HYPOXIA |
|-----------------|----------------|-----------------|----------------|----------------|---------------|----------------|---------------|
| 287.558         | 270.225        | 152.73          | 226.074        | 158.675        | 255.759       | 221.554        | 251.753       |
| 0.326303        | 0.102863       | 0.292812        | 0.114299       | 1.43579        | 0.737189      | 0.953007       | 0.560644      |
| 137.126         | 173.049        | 164.228         | 170.756        | 141.414        | 151.667       | 180.602        | 169.248       |

| 13-126 normoxia | 13-126 HYPOXIA | 15-176 normoxia | 15-176 HYPOXIA | 10-06 normoxia | 10-06 HYPOXIA | 16-184 normoxia | 16-184 HYPOXIA |
|-----------------|----------------|-----------------|----------------|----------------|---------------|-----------------|----------------|
| 128.969         | 159.457        | 138.795         | 214.157        | 108.102        | 143.012       | 98.1176         | 157.432        |
| 3.2417          | 0.902009       | 0.649644        | 0.291492       | 2.21566        | 1.5334        | 0.528258        | 0.295764       |
| 145.21          | 179.387        | 112.474         | 132.262        | 154.862        | 183.681       | 112.683         | 166.004        |

Values are expressed as Reads-per-Kilobase-per-Million matched reads (RPKM).

**Supplemental Table 5. Transcripts of tight junction protein genes are lower for all cybrids cultured in hypoxia than in room air.**

| <a href="#">tracking_id</a> | 11-31 normoxia | 11-31 HYPOXIA | 11-30 normoxia | 11-30 HYPOXIA | 11.38 normox | 11.38 HYPOX | 13.124 normox | 13.124 HYPOX |
|-----------------------------|----------------|---------------|----------------|---------------|--------------|-------------|---------------|--------------|
| <a href="#">OCLN</a>        | 1.0998         | 1.47645       | 2.21595        | 0.650693      | 2.24395      | 1.39374     | 2.49914       | 2.01838      |
| <a href="#">TJP1</a>        | 3.39907        | 2.76345       | 4.96728        | 1.96341       | 4.90931      | 2.85099     | 5.74854       | 3.53912      |

| 13.45 H normox | 13.45 H HYPOX | 16.186 normox | 16.186 HYPOX | 11.08 normox | 11.08 HYPOX | 13.103 normox | 13.103 HYPOX |
|----------------|---------------|---------------|--------------|--------------|-------------|---------------|--------------|
| 0.976347       | 1.15972       | 2.29511       | 1.00747      | 3.02433      | 2.72341     | 2.06283       | 0.856506     |
| 2.4331         | 2.61054       | 3.07859       | 0.999963     | 6.54895      | 3.08761     | 4.47968       | 2.17855      |

| 14-135 normoxia | 14-135 HYPOXIA | 16-190 normoxia | 16-190 HYPOXIA | 11-18 normoxia | 11-18 HYPOXIA | 13-55 normoxia | 13-55 HYPOXIA |
|-----------------|----------------|-----------------|----------------|----------------|---------------|----------------|---------------|
| 0.992384        | 1.20245        | 2.94434         | 2.59705        | 1.94416        | 1.55445       | 1.14019        | 1.40275       |
| 1.22128         | 1.10268        | 9.6376          | 2.62006        | 3.84719        | 2.46155       | 2.97211        | 2.76858       |

| 13-126 normoxia | 13-126 HYPOXIA | 15-176 normoxia | 15-176 HYPOXIA | 10-06 normoxia | 10-06 HYPOXIA | 16-184 normoxia | 16-184 HYPOXIA |
|-----------------|----------------|-----------------|----------------|----------------|---------------|-----------------|----------------|
| 4.27803         | 2.67753        | 1.93878         | 1.46684        | 5.22227        | 2.72177       | 3.28947         | 2.96846        |
| 6.78457         | 3.75345        | 3.22741         | 1.41463        | 6.56698        | 5.03422       | 3.77525         | 3.87615        |

Values are expressed as Reads-per-Kilobase-per-Million matched reads (RPKM).

**Supplementary Figure 1. Cybrids Used in These Experiments Have Similar mtDNA Copy Numbers.** DNA from cybrids grown in room air was measured by qRT-PCR against the mitochondrial gene *MT-ND2* and the nuclear gene *18S*, and the ratio *MT-ND2* / *18S* was calculated for each cybrid. Within each mtDNA background, values were normalized to those of the non-diabetic cybrids. (n = 7 Euro/Non-DM, n = 4 Euro/DM, n = 4 Afr+Asi/Non-DM, n = 4 Afr+Asi/DM; 4 independent experiments total) ns, \* = p < 0.05, \*\* = p ≤ 0.01, \*\*\* = p ≤ 0.001

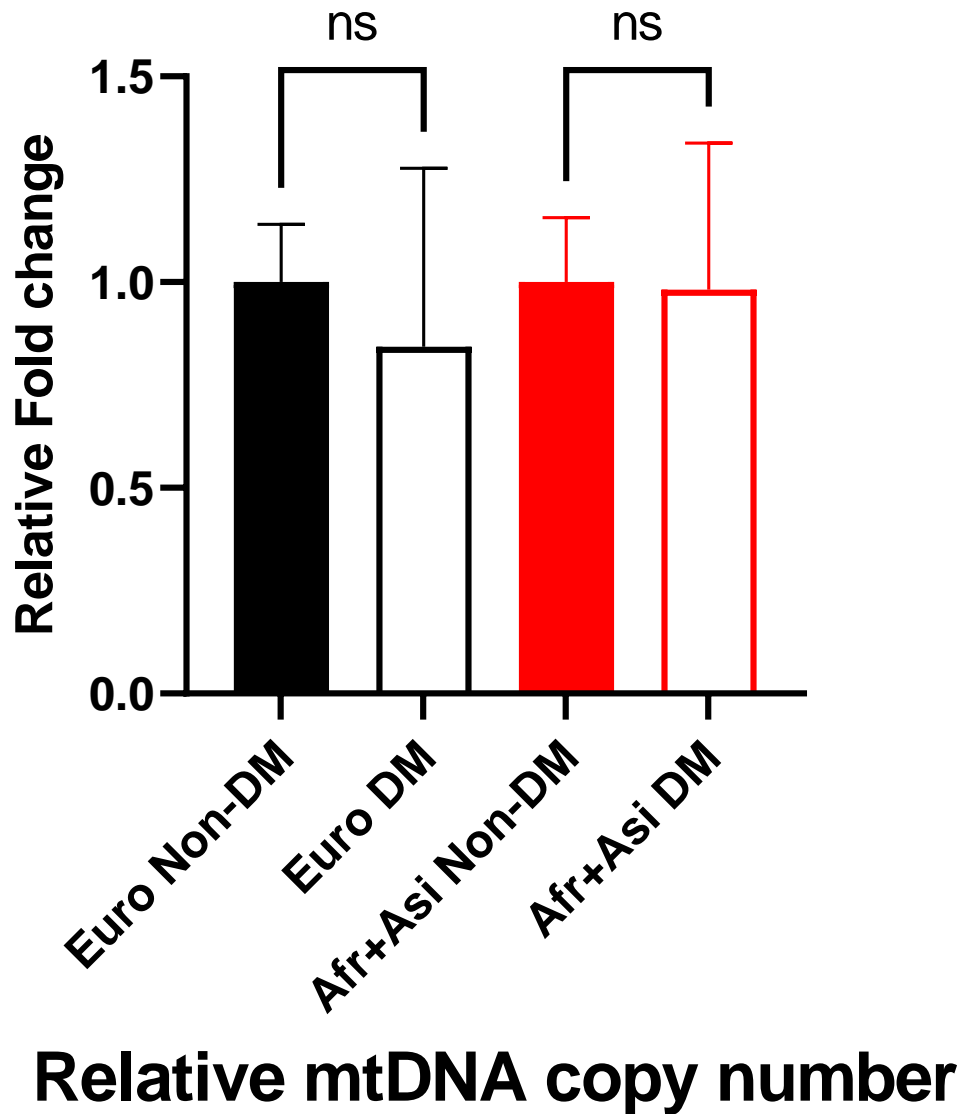

# **Complete blots**



### **Detail concerning Western blot analysis:-**

We ran 8 sets of blots for these experiments. Blots #1,3, 5, and 7 were run and then cut into 2 pieces so that the Upper Part could be exposed to antibodies to ZO-1Plus (225 kDa) and the Lower Part could be exposed to the Occludin antibody (29 kDa). Blots #2, 4, 6, and 8 were also run as intact blots and then cut above the 75kDa marker. The Upper Part was exposed to the ZO-1 Minus antibody (200 kDa), while the Lower Part was exposed to the antibody for  $\beta$ -actin (42 kDa).

**For more detail:** Briefly, we separated the proteins using a 4-12% gradient gel. We then transferred these proteins from the gradient gels to Blot #1 -8 membrane. After wrapping in plastic wrap, the bright field image was obtained without the ECL camera (Panel a, Bright filed image). After blocking the membranes, we cut the membranes above the 75kDa ladder so it contained proteins larger than 75kDa (Upper Part). The Blots #1, 3 and 5 Upper Parts were exposed to antibodies for ZO-1 and the band for ZO-1 Plus (225 kDa) was measured. Blots #1, 3, 5 and 7 Lower Parts were exposed to antibodies to Occludin (29 kDa). The Blots #2, 4, 6, and 8 Upper Parts were exposed to antibodies to ZO-1 antibodies and the band for ZO-1 Minus was measured (200 kDa). The Blots #2, 4, 6, and 8 Lower Parts were exposed to the beta actin antibody (42 kDa). The images for the Upper Part and Lower Part blots were captured using the ECL camera on the Biorad Gel Doc (BioRad, Hercules, CA). The Biorad Gel Doc allows us to take images with either high exposure (Panels b) or low exposure (Panels c) so the variations in intensities were captured. We updated this information in the Materials and Methods section on western blotting in the revised manuscript.

# Euro/Non-DM cybrids

Blot#1

a) Bright field image

b) High exposure

c) Low exposure

▼ indicates a horizontally cut membrane with greater than 75kDa hybridization with ZO-1 antibody (upper part) and less than or equal to 75kDa stain with Occludin (lower part).

L: Ladder

Upper part

Lower part

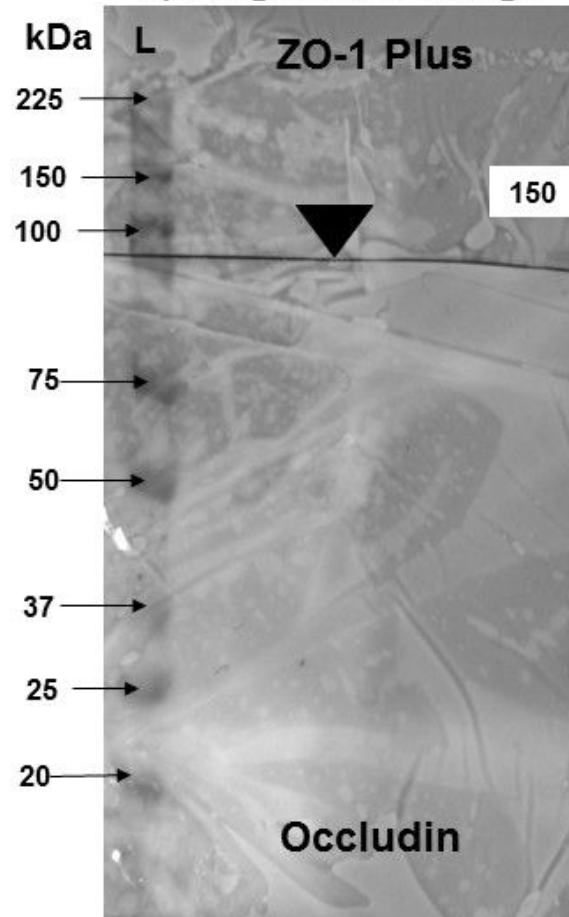

Gel doc image of the blot before switching on ECL camera

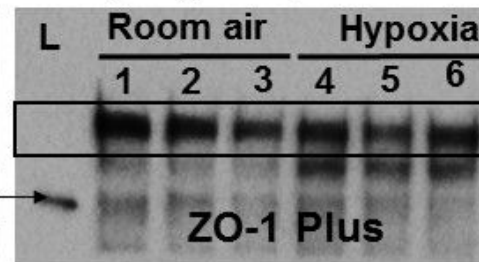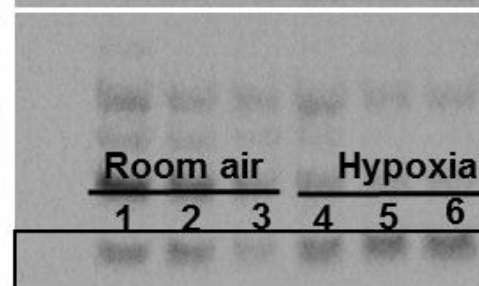

Gel doc image of the blot after switching on ECL camera

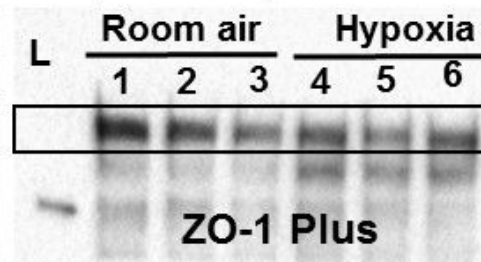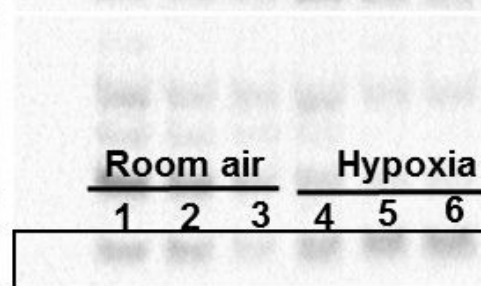

Gel doc image of the blot after switching on ECL camera

# Euro/Non-DM cybrids

▼ indicates a horizontally cut membrane with greater than 75kDa hybridization with ZO-1 antibody (upper part) and less than or equal to 75kDa stain with  $\beta$ -actin (lower part).

L: Ladder

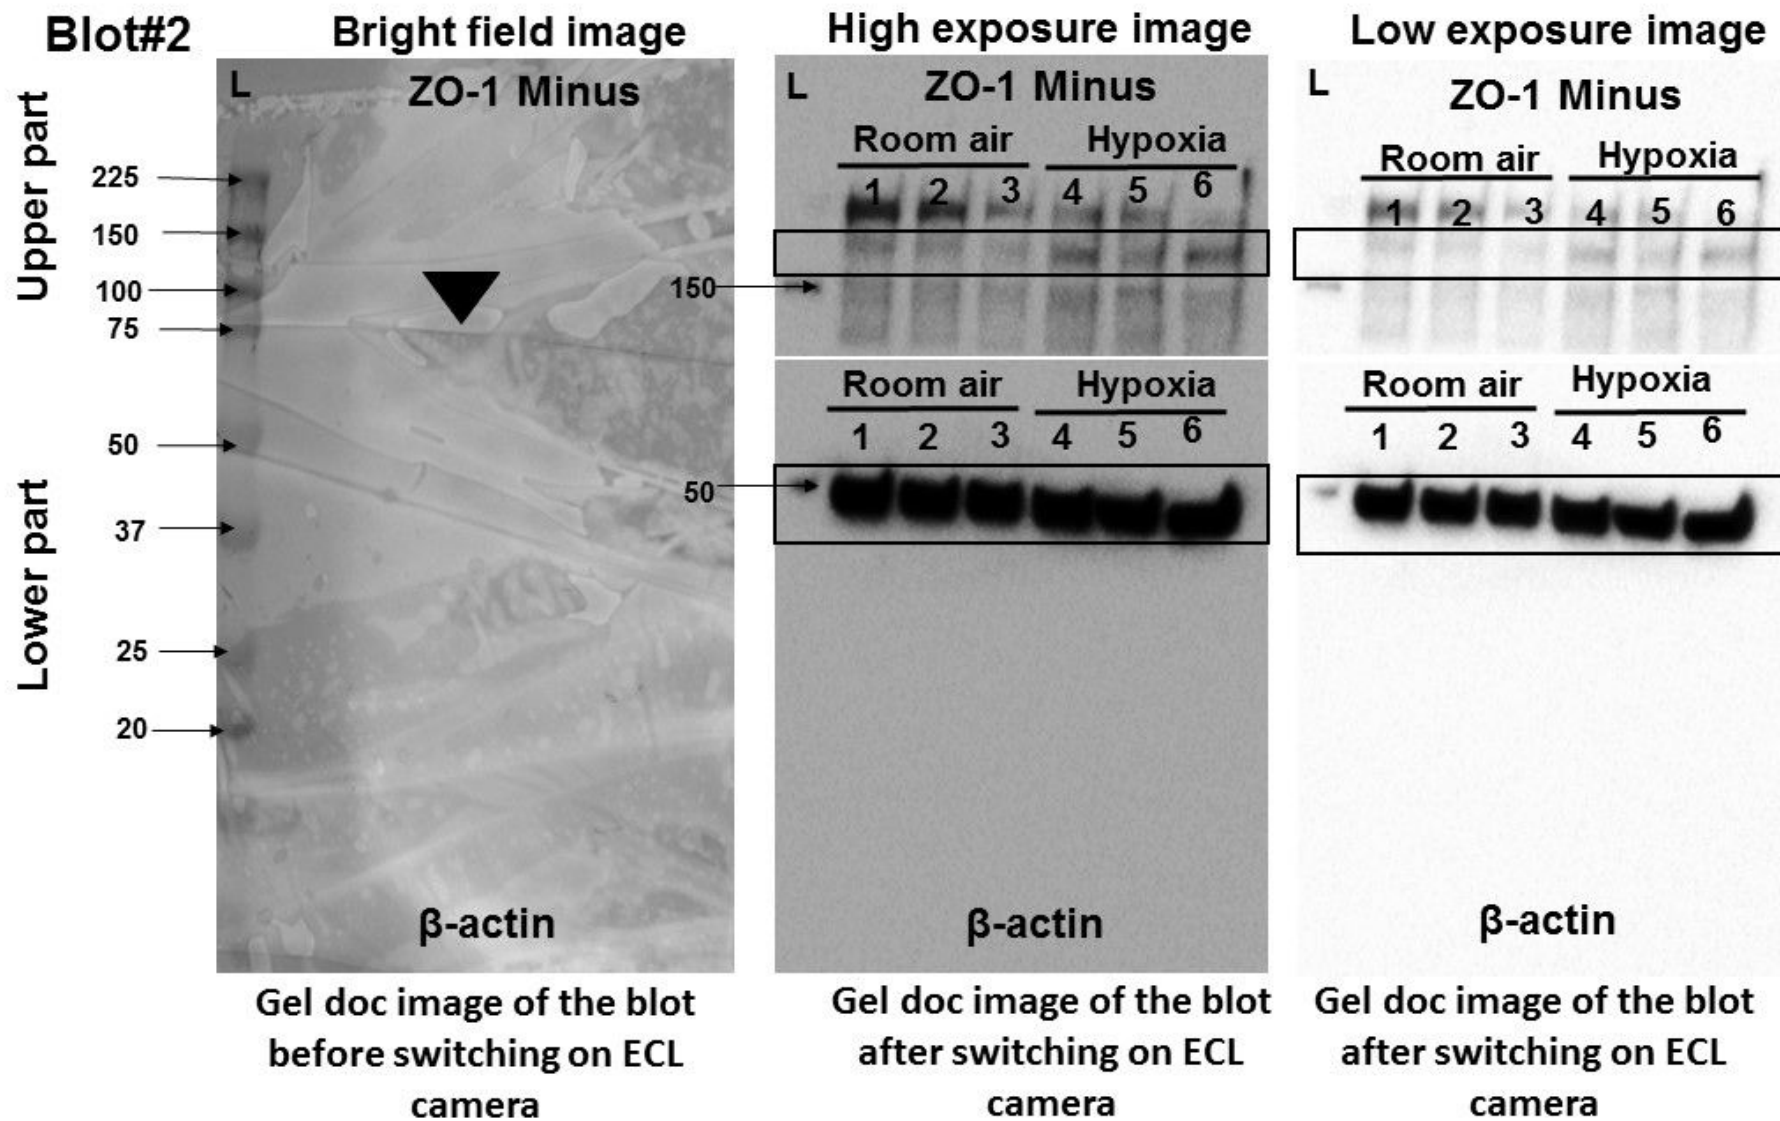

# Euro/DM cybrids

**Blot #3**

▼ indicates a horizontally cut membrane with greater than 75kDa hybridization with ZO-1 antibody (upper part) and less than or equal to 75kDa stain with Occludin (lower part).

L: Ladder

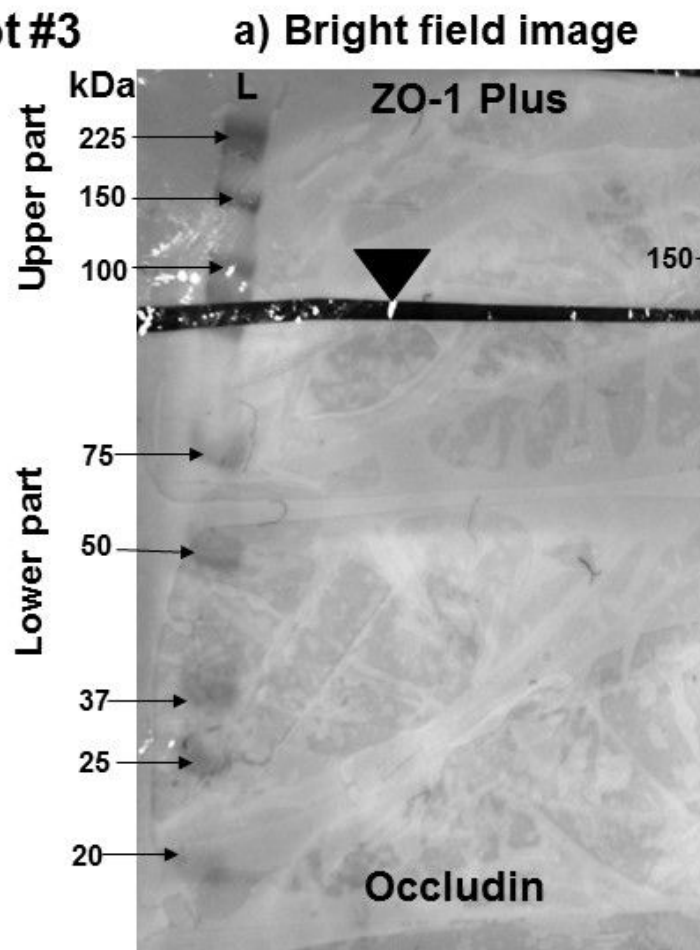

Gel doc image of the blot before switching on ECL camera

**b) High exposure image**

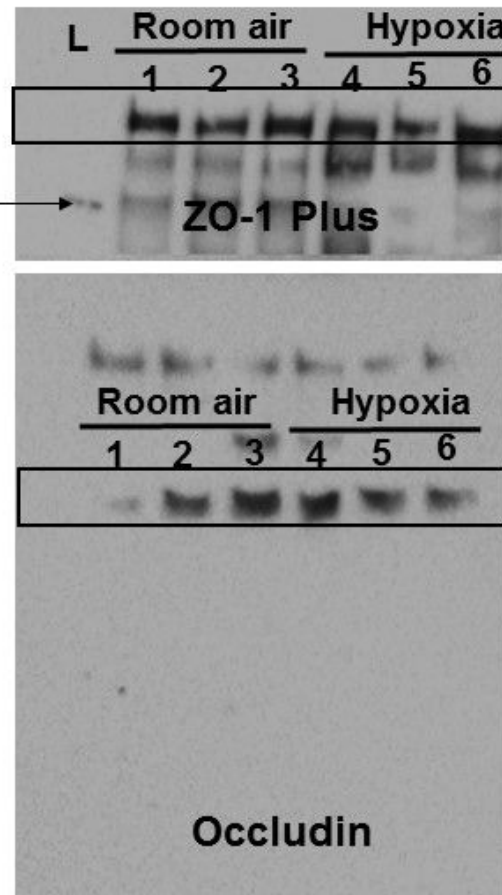

Gel doc image of the blot after switching on ECL camera

**c) Low exposure image**

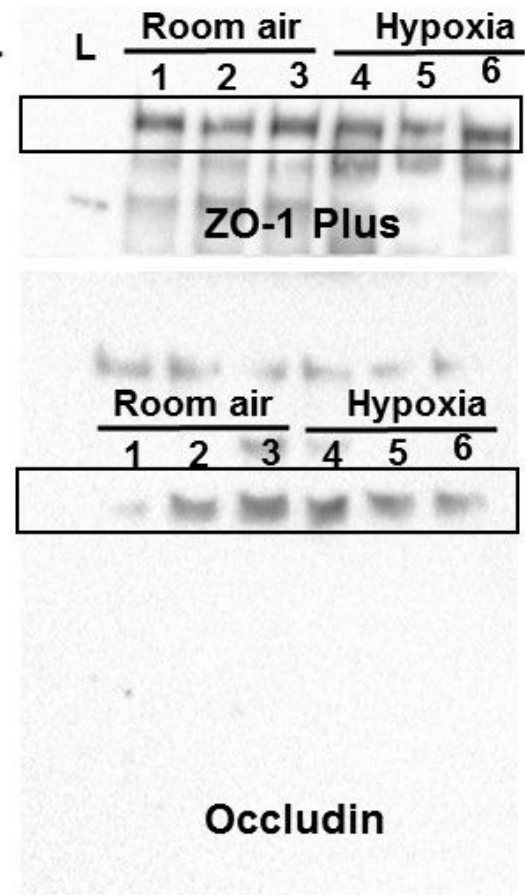

Gel doc image of the blot after switching on ECL camera

# Euro/DM cybrids

**Blot# 4**

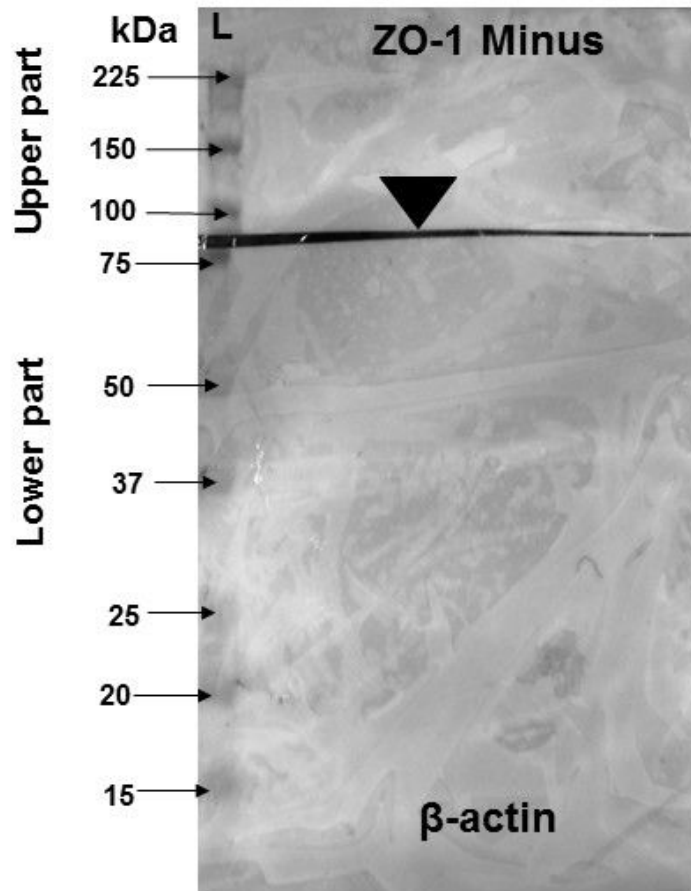

Gel doc image of the blot before switching on ECL camera

b) Low exposure image

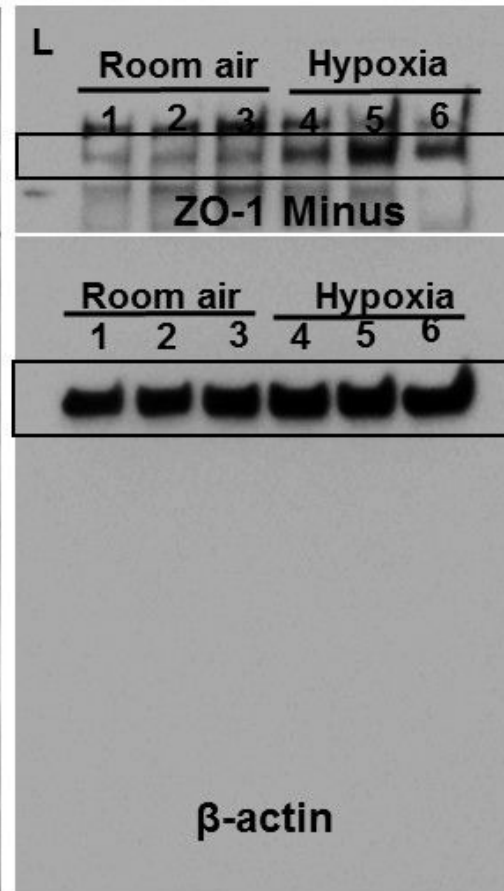

Gel doc image of the blot after switching on ECL camera

c) High exposure image

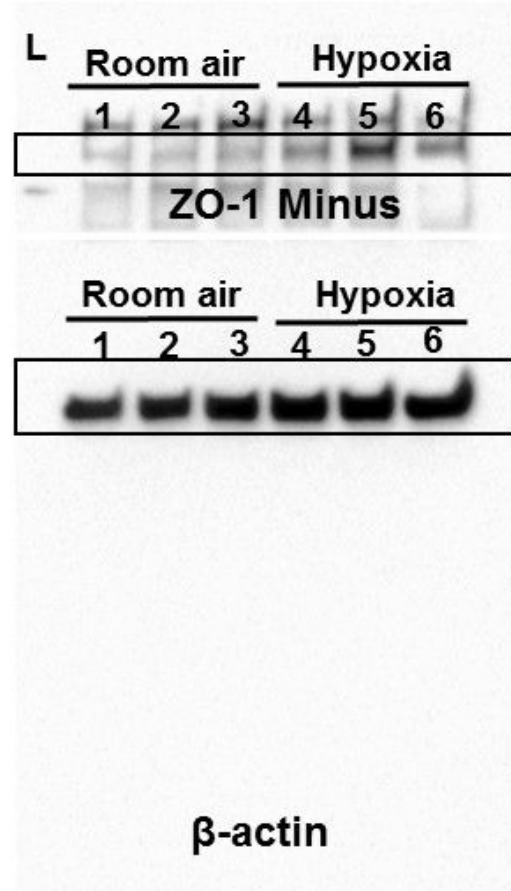

Gel doc image of the blot after switching on ECL camera

# Afr+Asi/Non-DM cybrids

## Blot #5

▼ indicates a horizontally cut membrane with greater than 75kDa hybridization with ZO-1 antibody (upper part) and less than or equal to 75kDa stain with Occludin (lower part).

L: Ladder

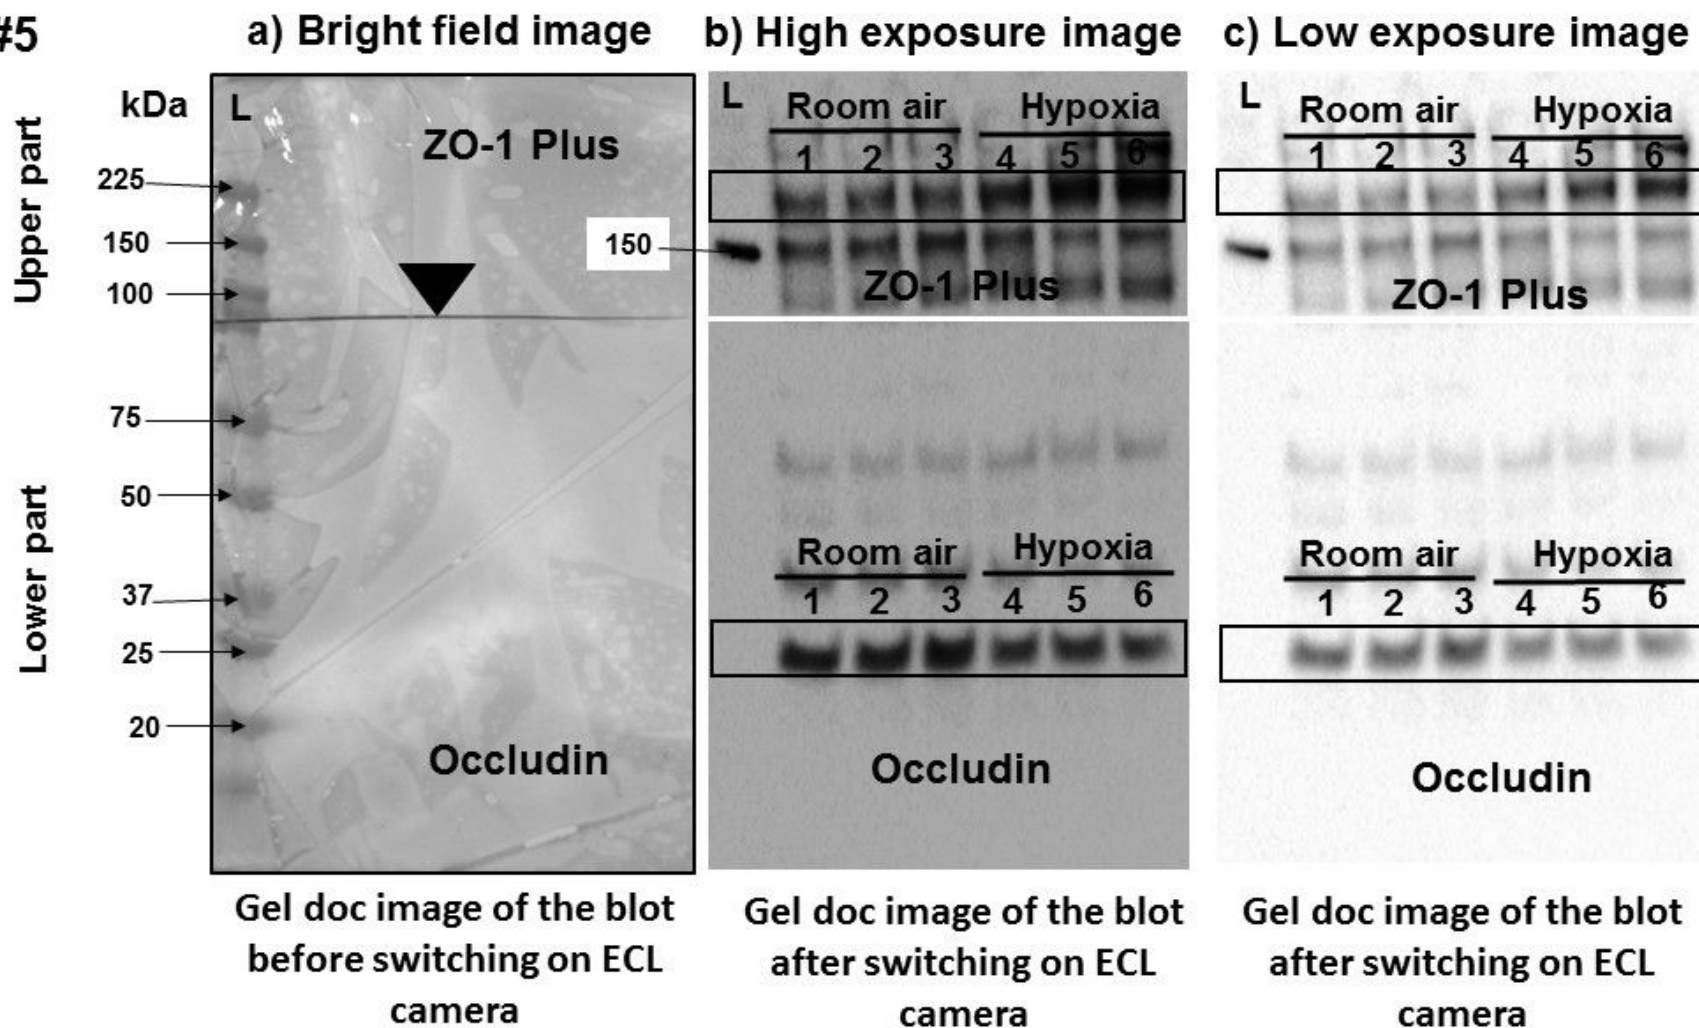

## Afr+Asi/Non-DM cybrids

**Blot #6**

**a) Bright field image**

**b) High exposure image**

**c) Low exposure image**

▼ indicates a horizontally cut membrane with greater than 75kDa hybridization with ZO-1 antibody (upper part) and less than or equal to 75kDa stain with  $\beta$ -actin (lower part).

L: Ladder

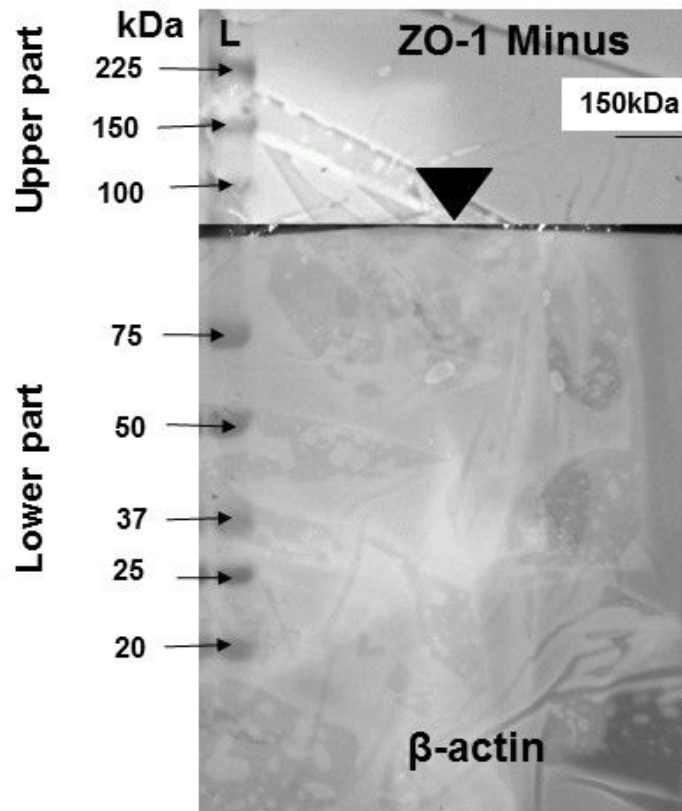

Gel doc image of the blot before switching on ECL

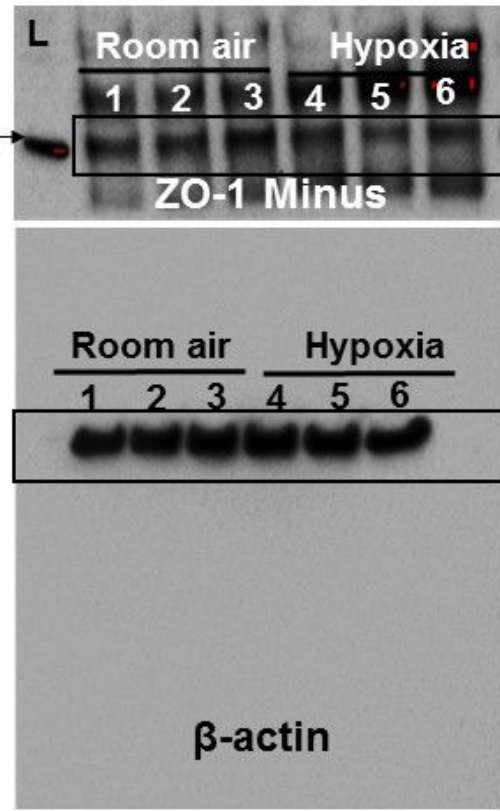

Gel doc image of the blot after switching on ECL camera

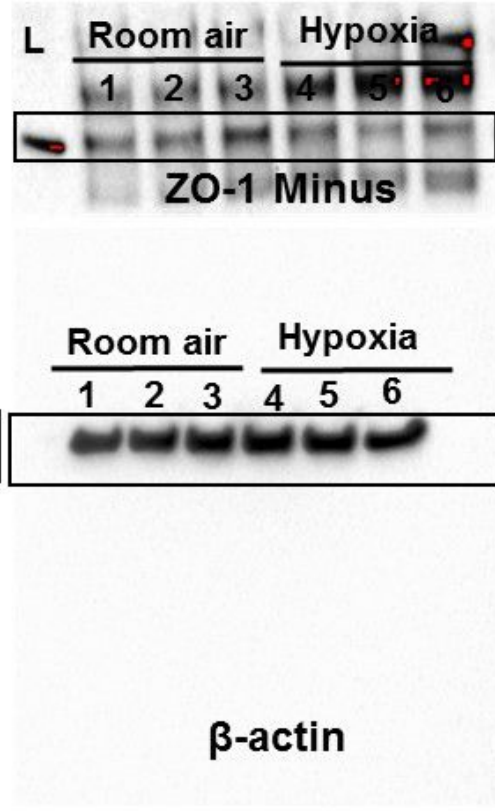

Gel doc image of the blot after switching on ECL camera

# Afr+Asi/DM cybrids

**Blot #7** a) Bright field image

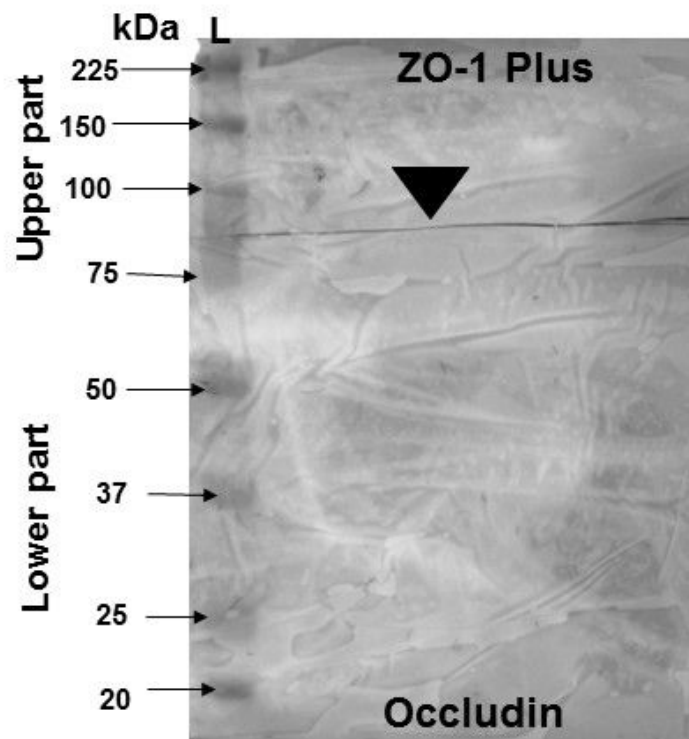

Gel doc image of the blot  
before switching on ECL  
camera

b) High exposure image

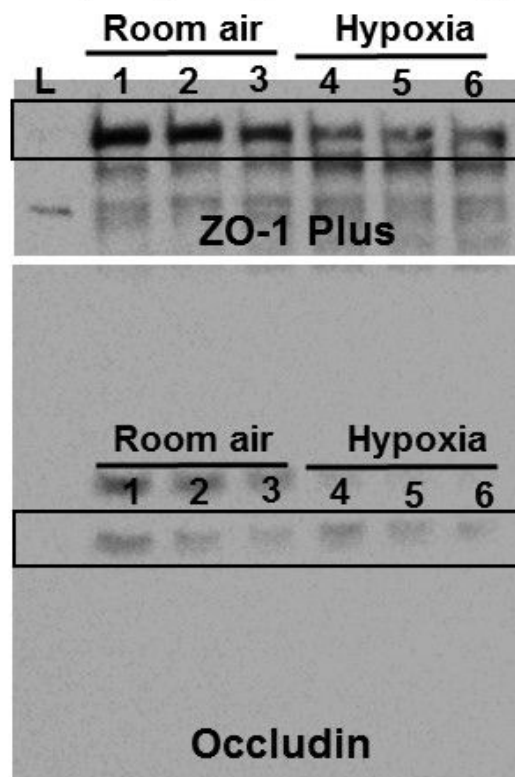

Gel doc image of the blot  
after switching on ECL  
camera

c) Low exposure image

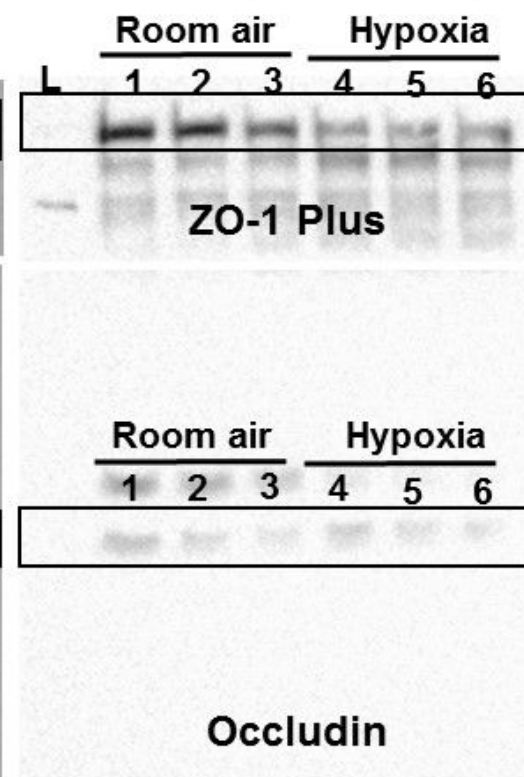

Gel doc image of the blot  
after switching on ECL  
camera

▼ indicates a horizontally cut membrane with greater than 75kDa hybridization with ZO-1 antibody (upper part) and less than or equal to 75kDa stain with Occludin (lower part).

L: Ladder



# Afr+Asi/DM cybrids

## Blot #8

▼ indicates a horizontally cut membrane with greater than 75kDa hybridisation with ZO-1 antibody (upper part) and less than or equal to 75kDa stain with  $\beta$ -actin (lower part).

L: Ladder

### a) Bright field image

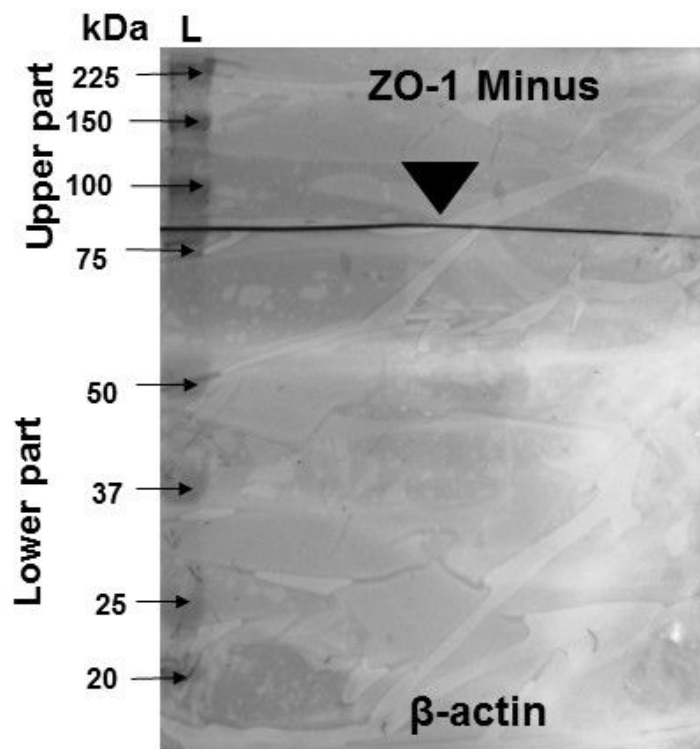

Gel doc image of the blot before switching on ECL camera

### b) High exposure image

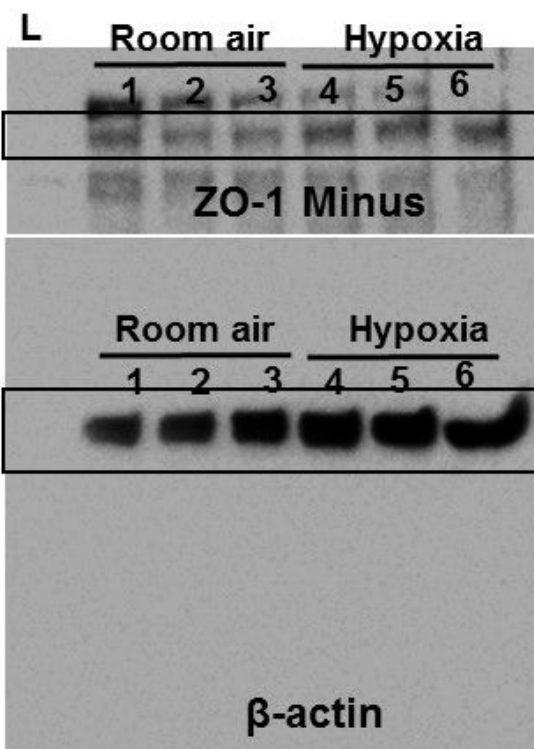

Gel doc image of the blot after switching on ECL camera

### c) High exposure image

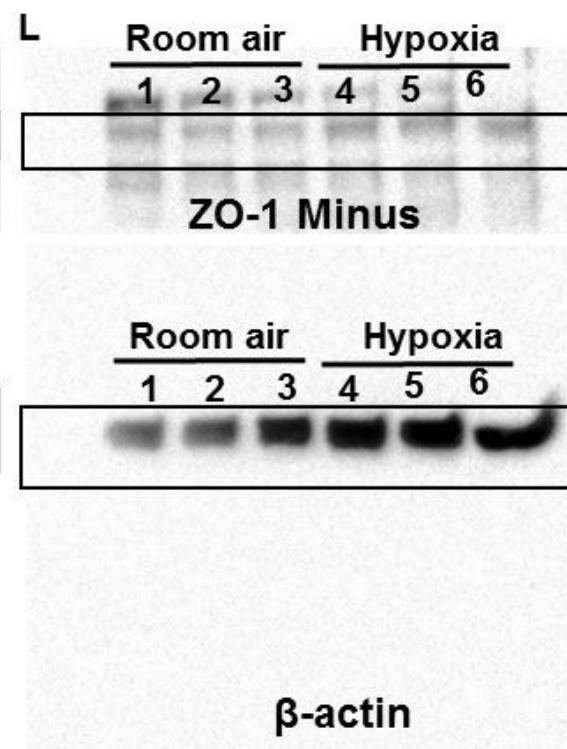

Gel doc image of the blot after switching on ECL camera
